# Supplementary material
Source: PubMed Central journal article supplement (PMC8569603)

All studies

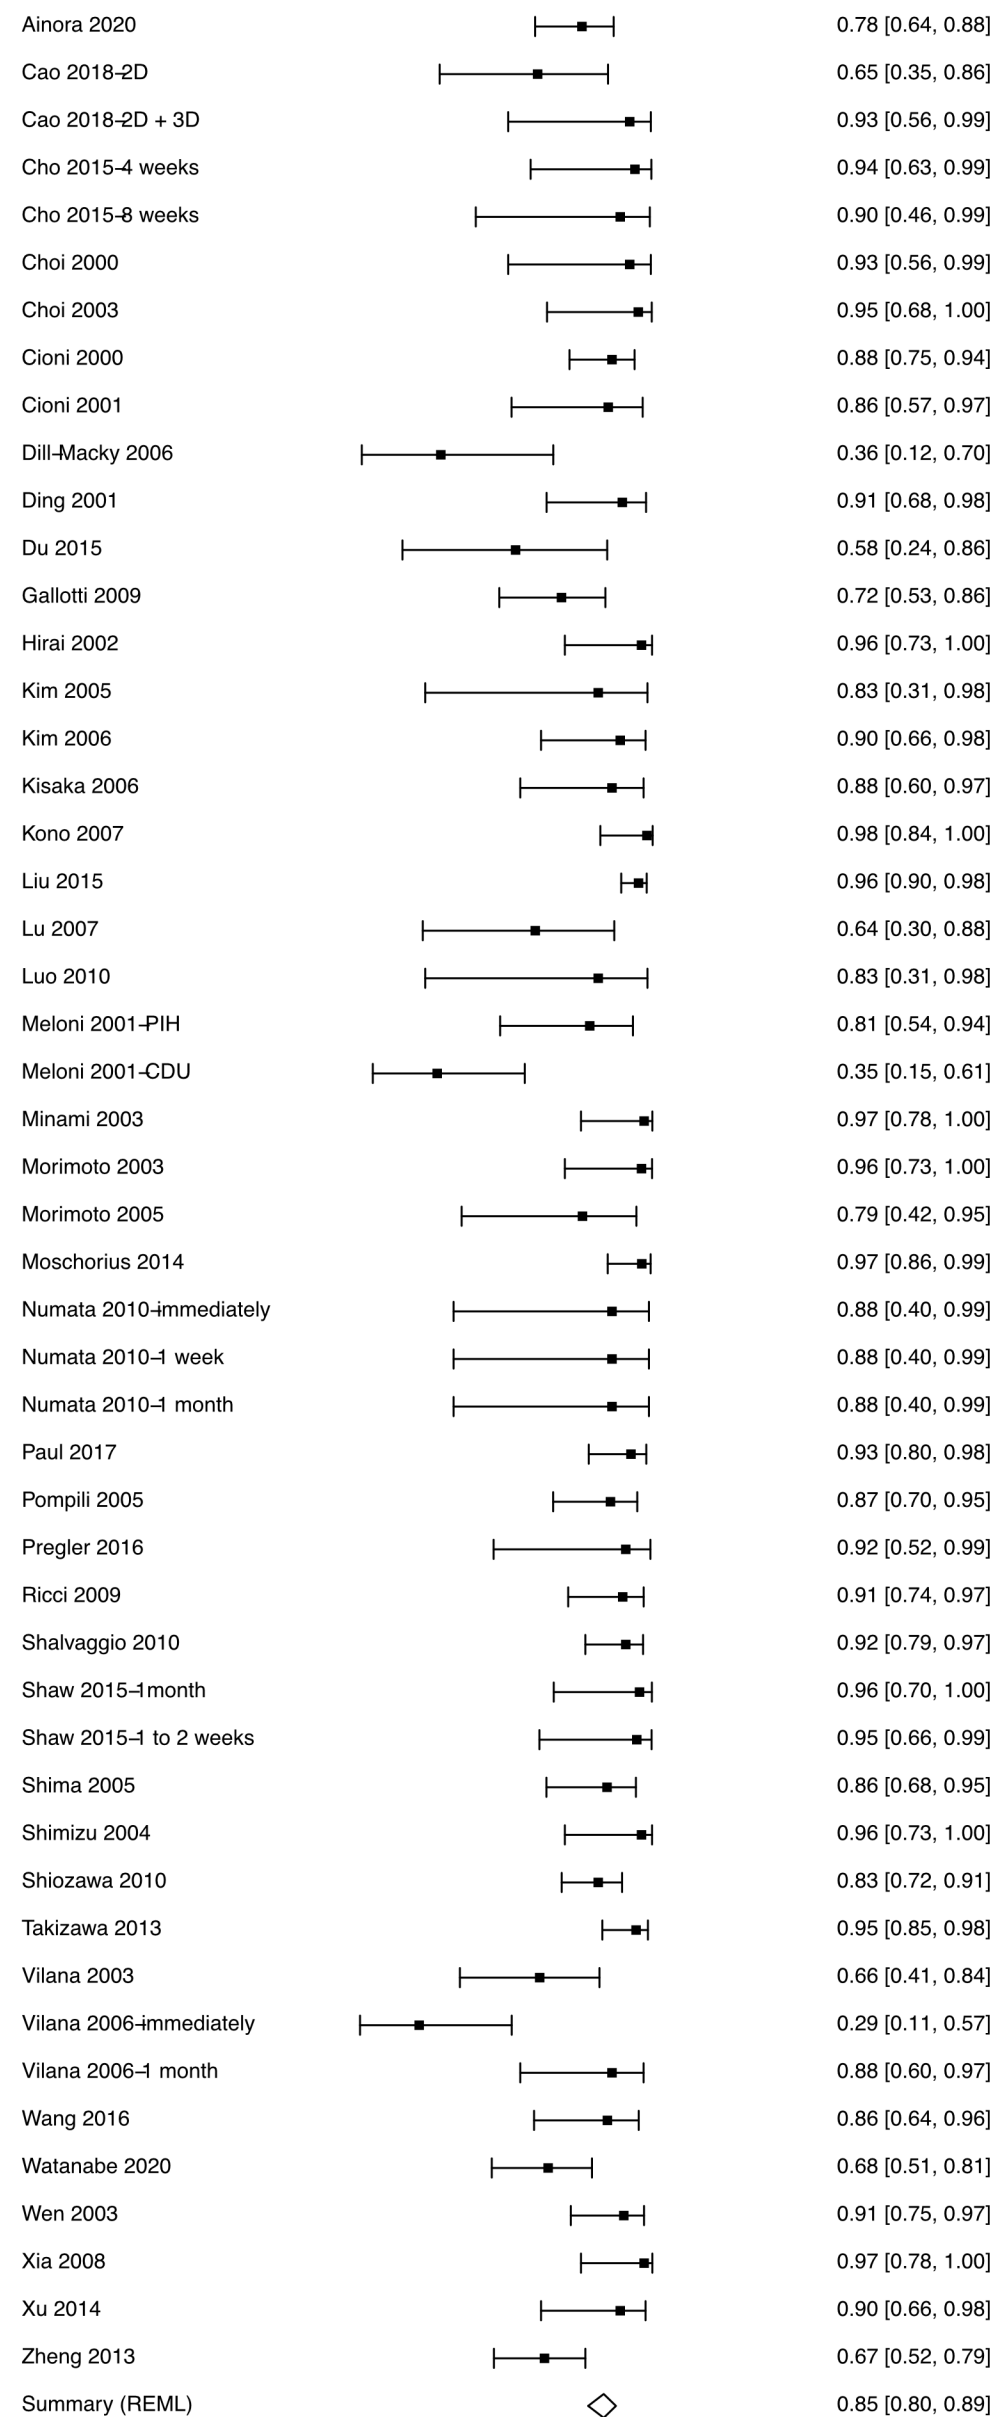

0.00 0.25 0.50 0.75 1.00  
sensitivity (95% CI)

All studies

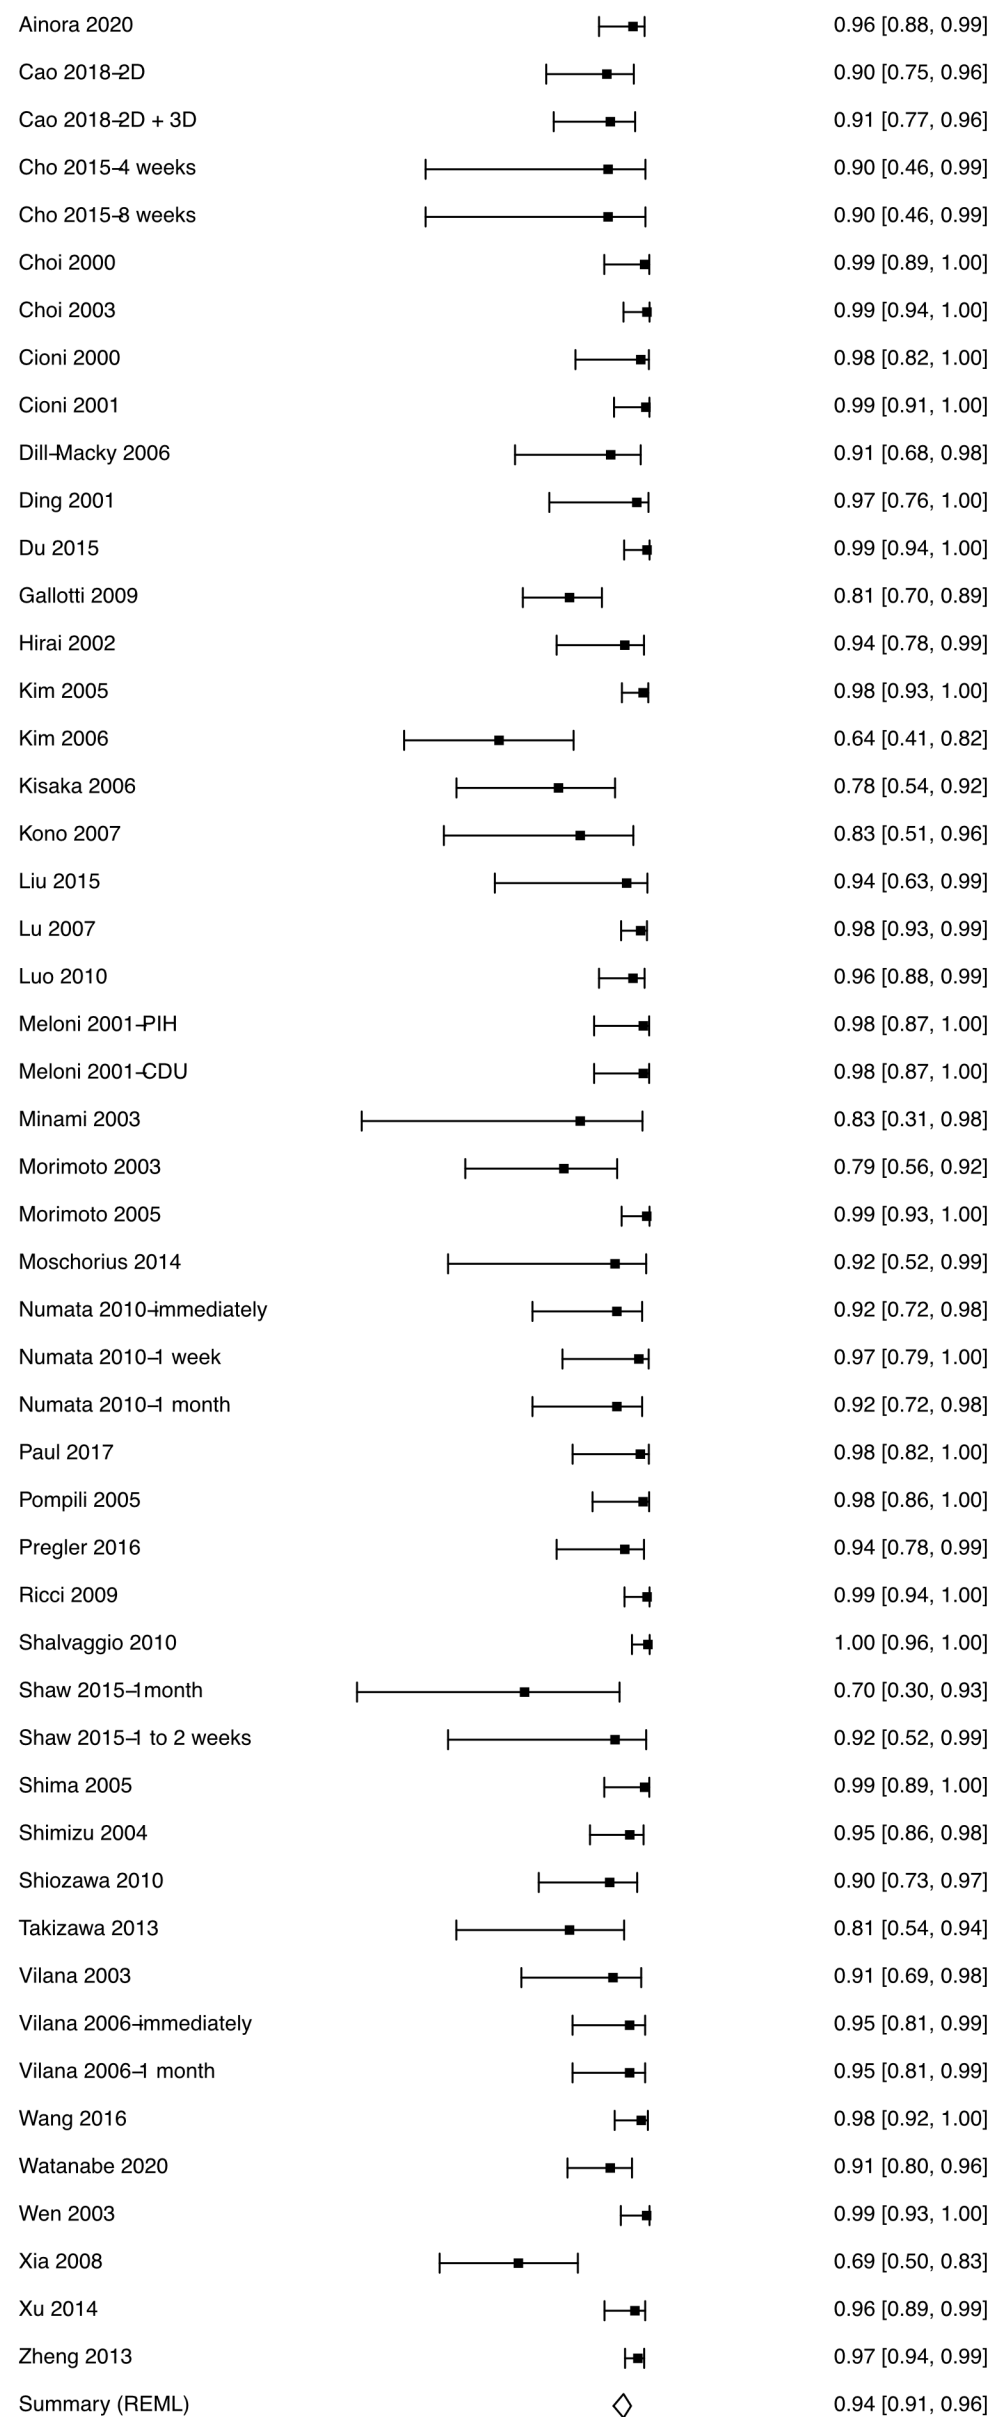

0.00 0.25 0.50 0.75 1.00  
specificity (95% CI)

All studies

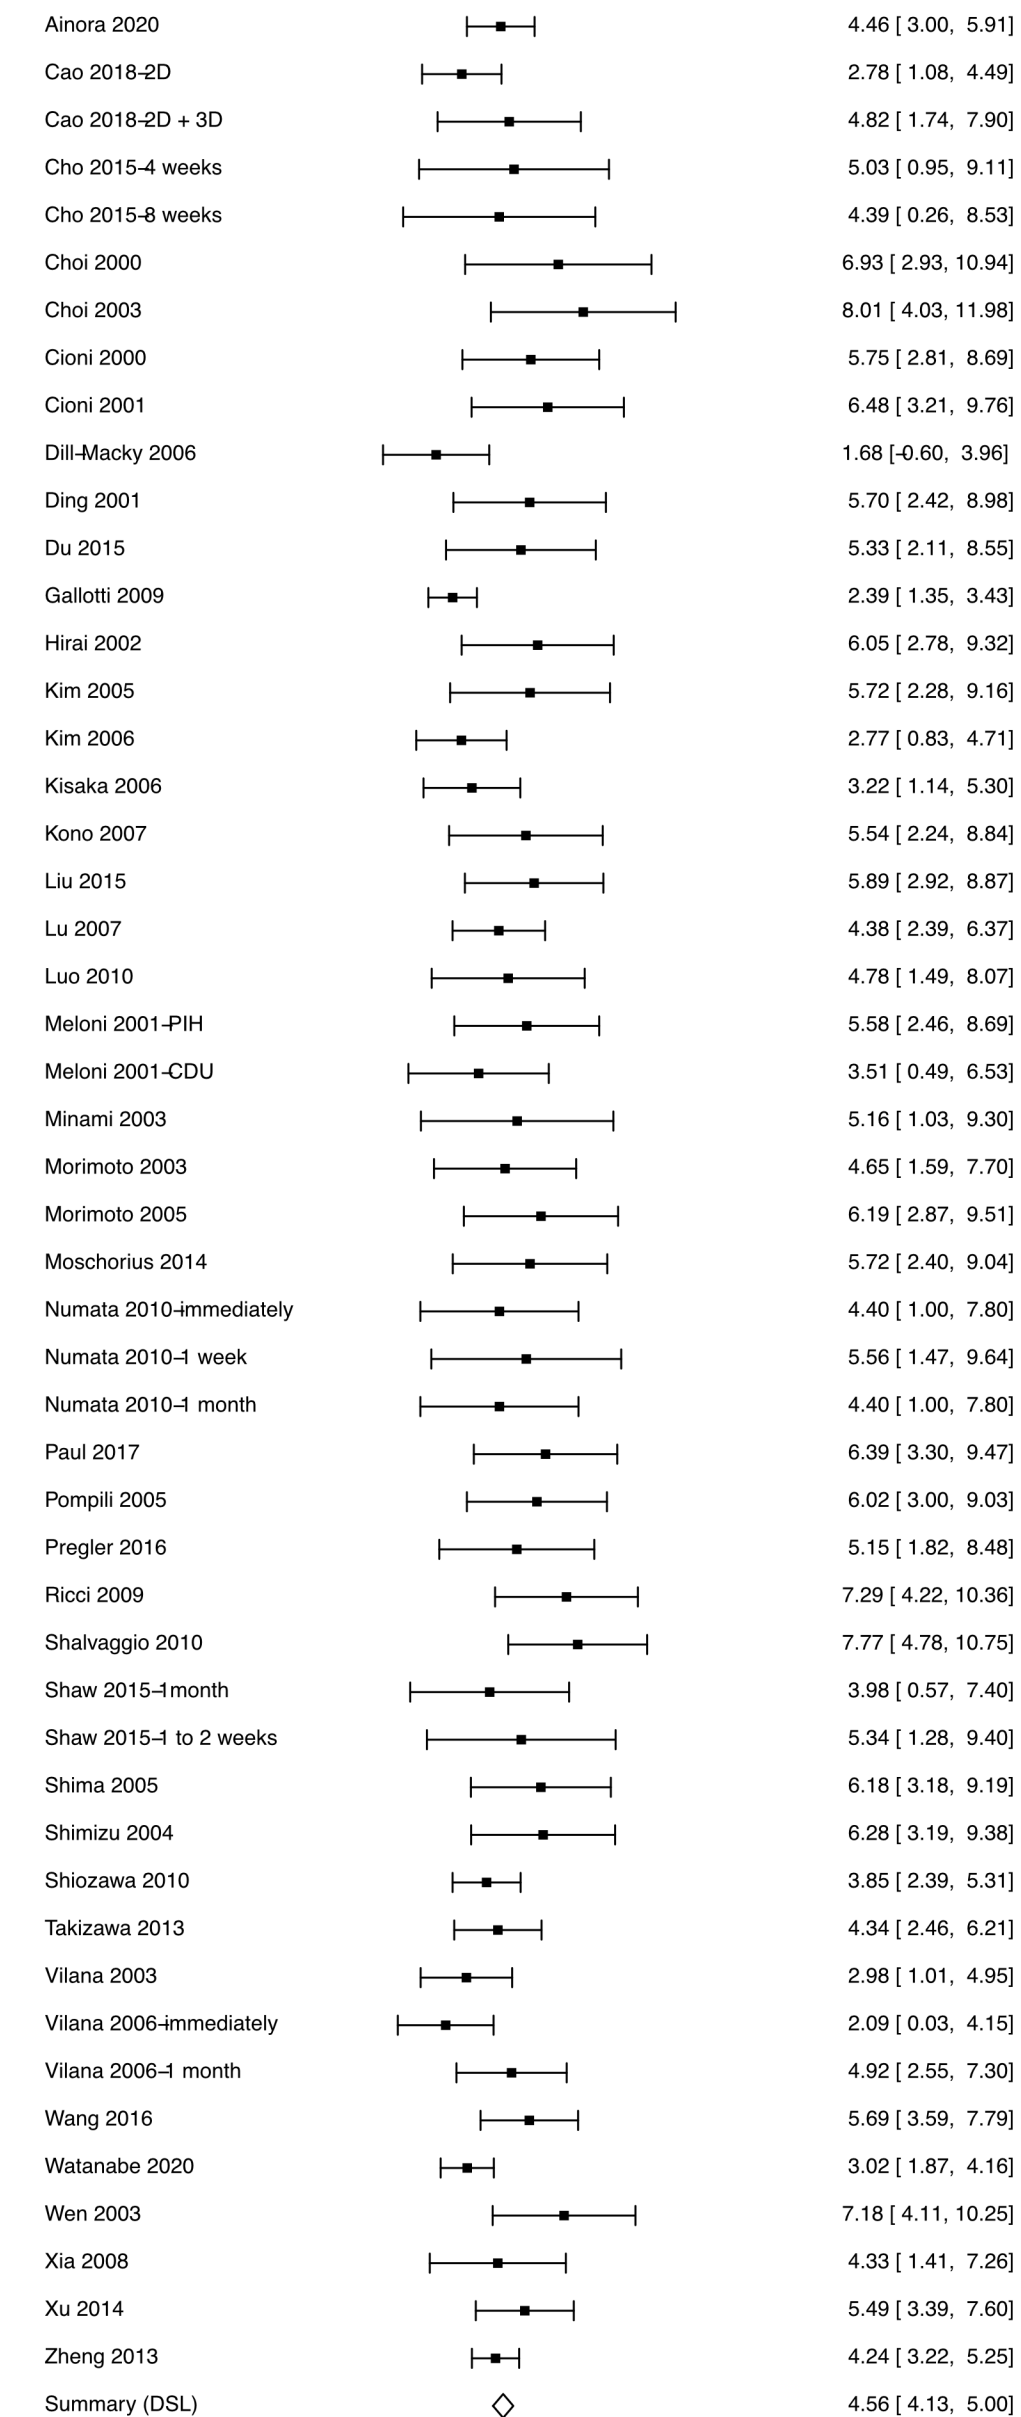

-0.60 2.54 5.69 8.83 11.98  
log diagnostic odds ratio

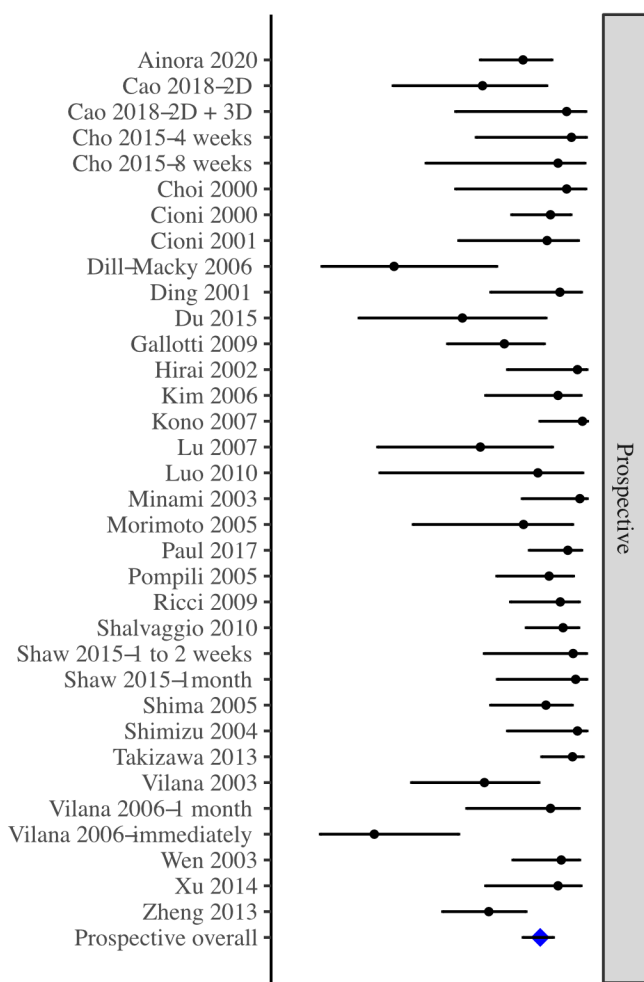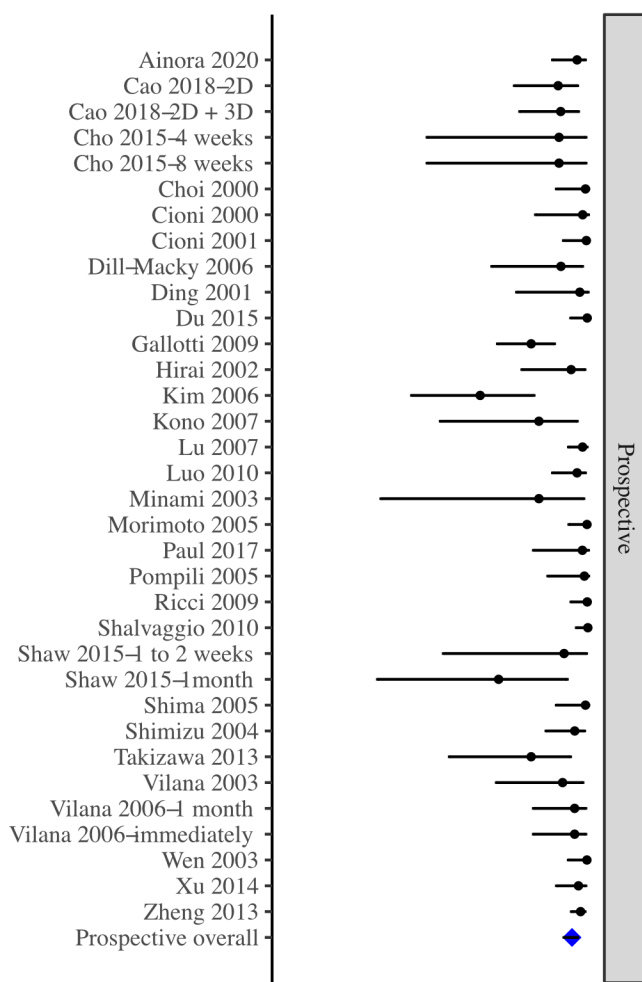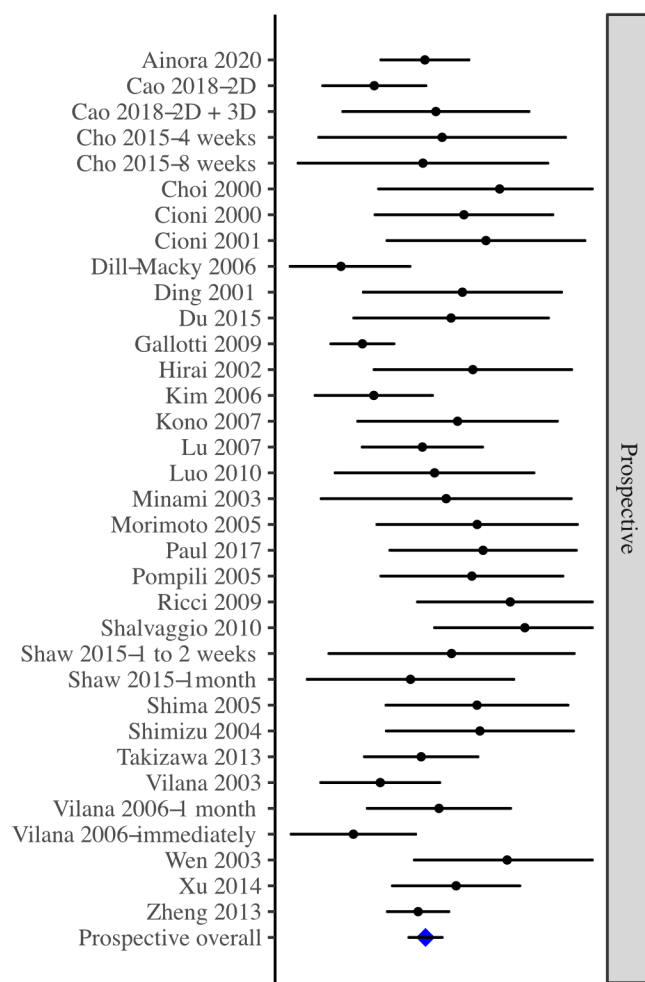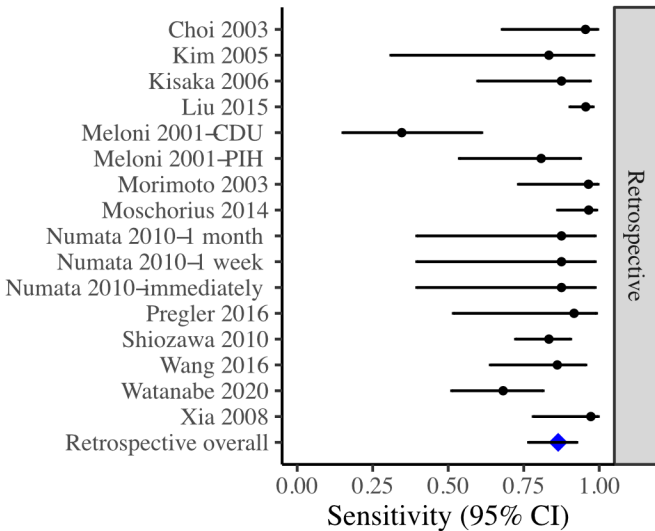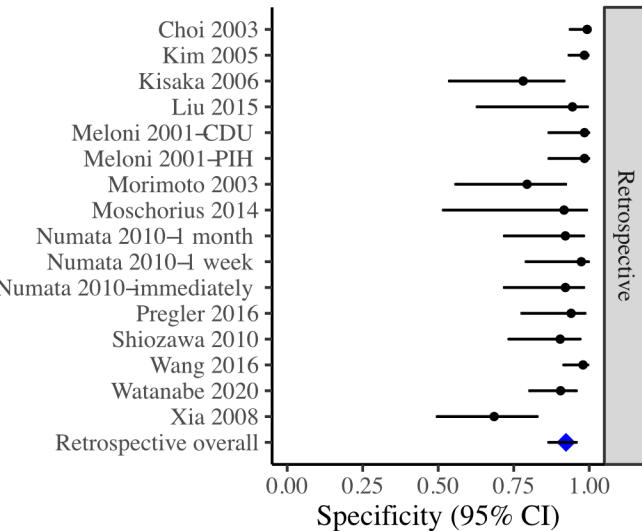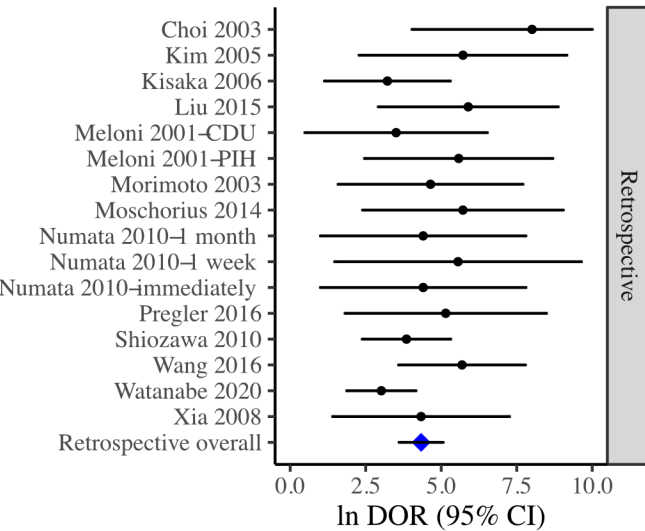

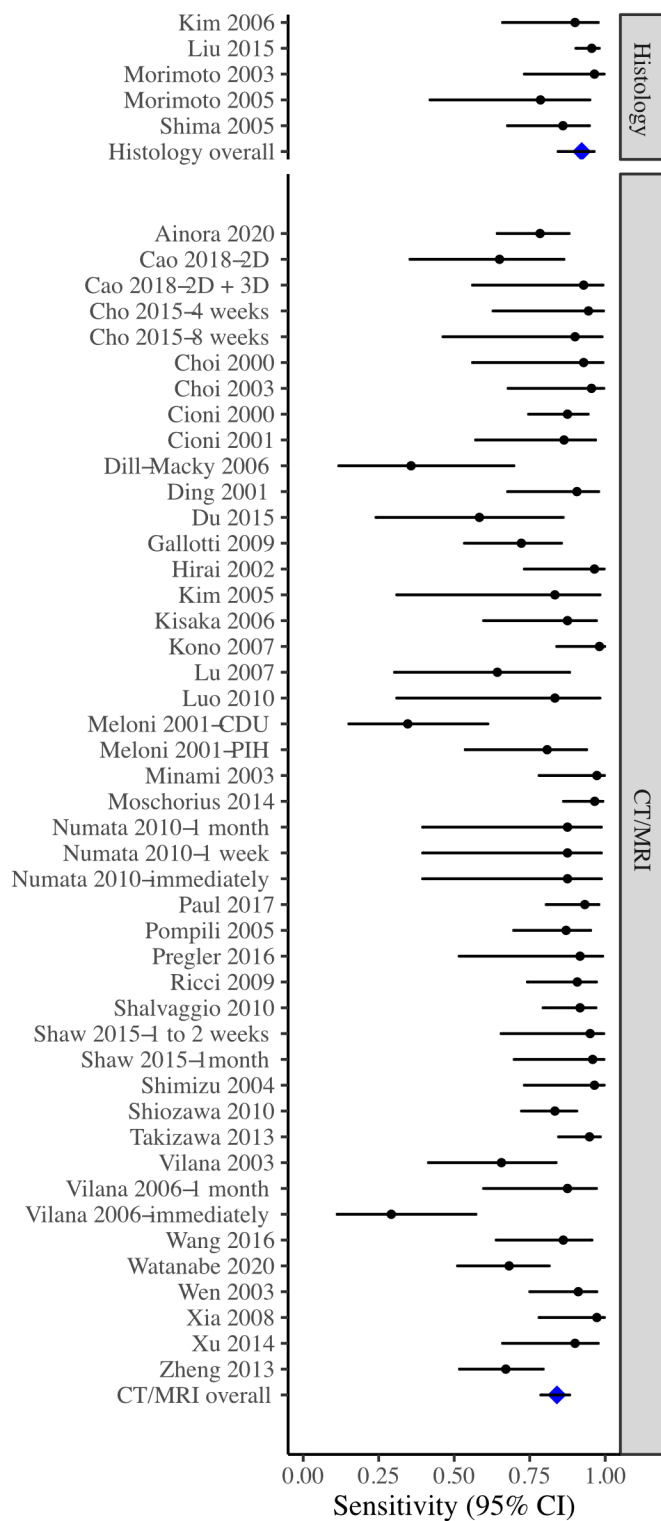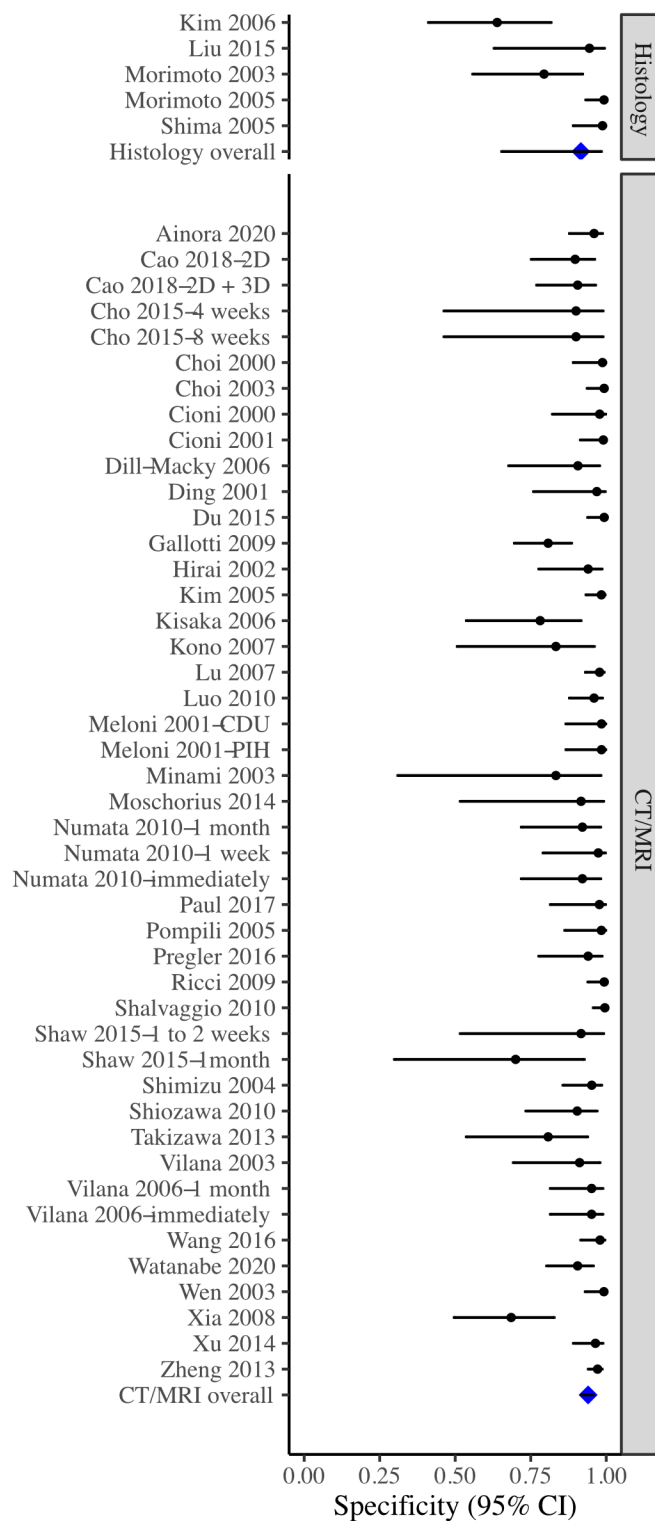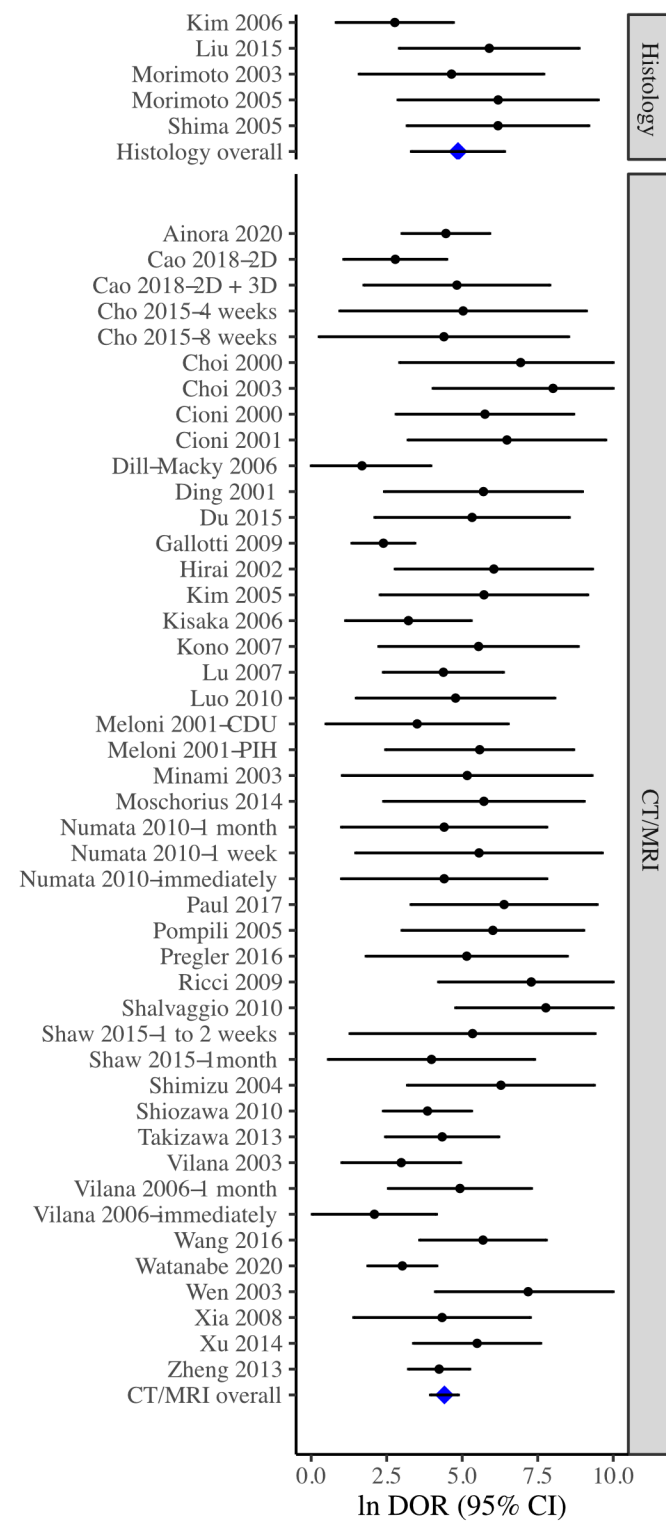

# Ablation - APHE w/ or w/o Washout

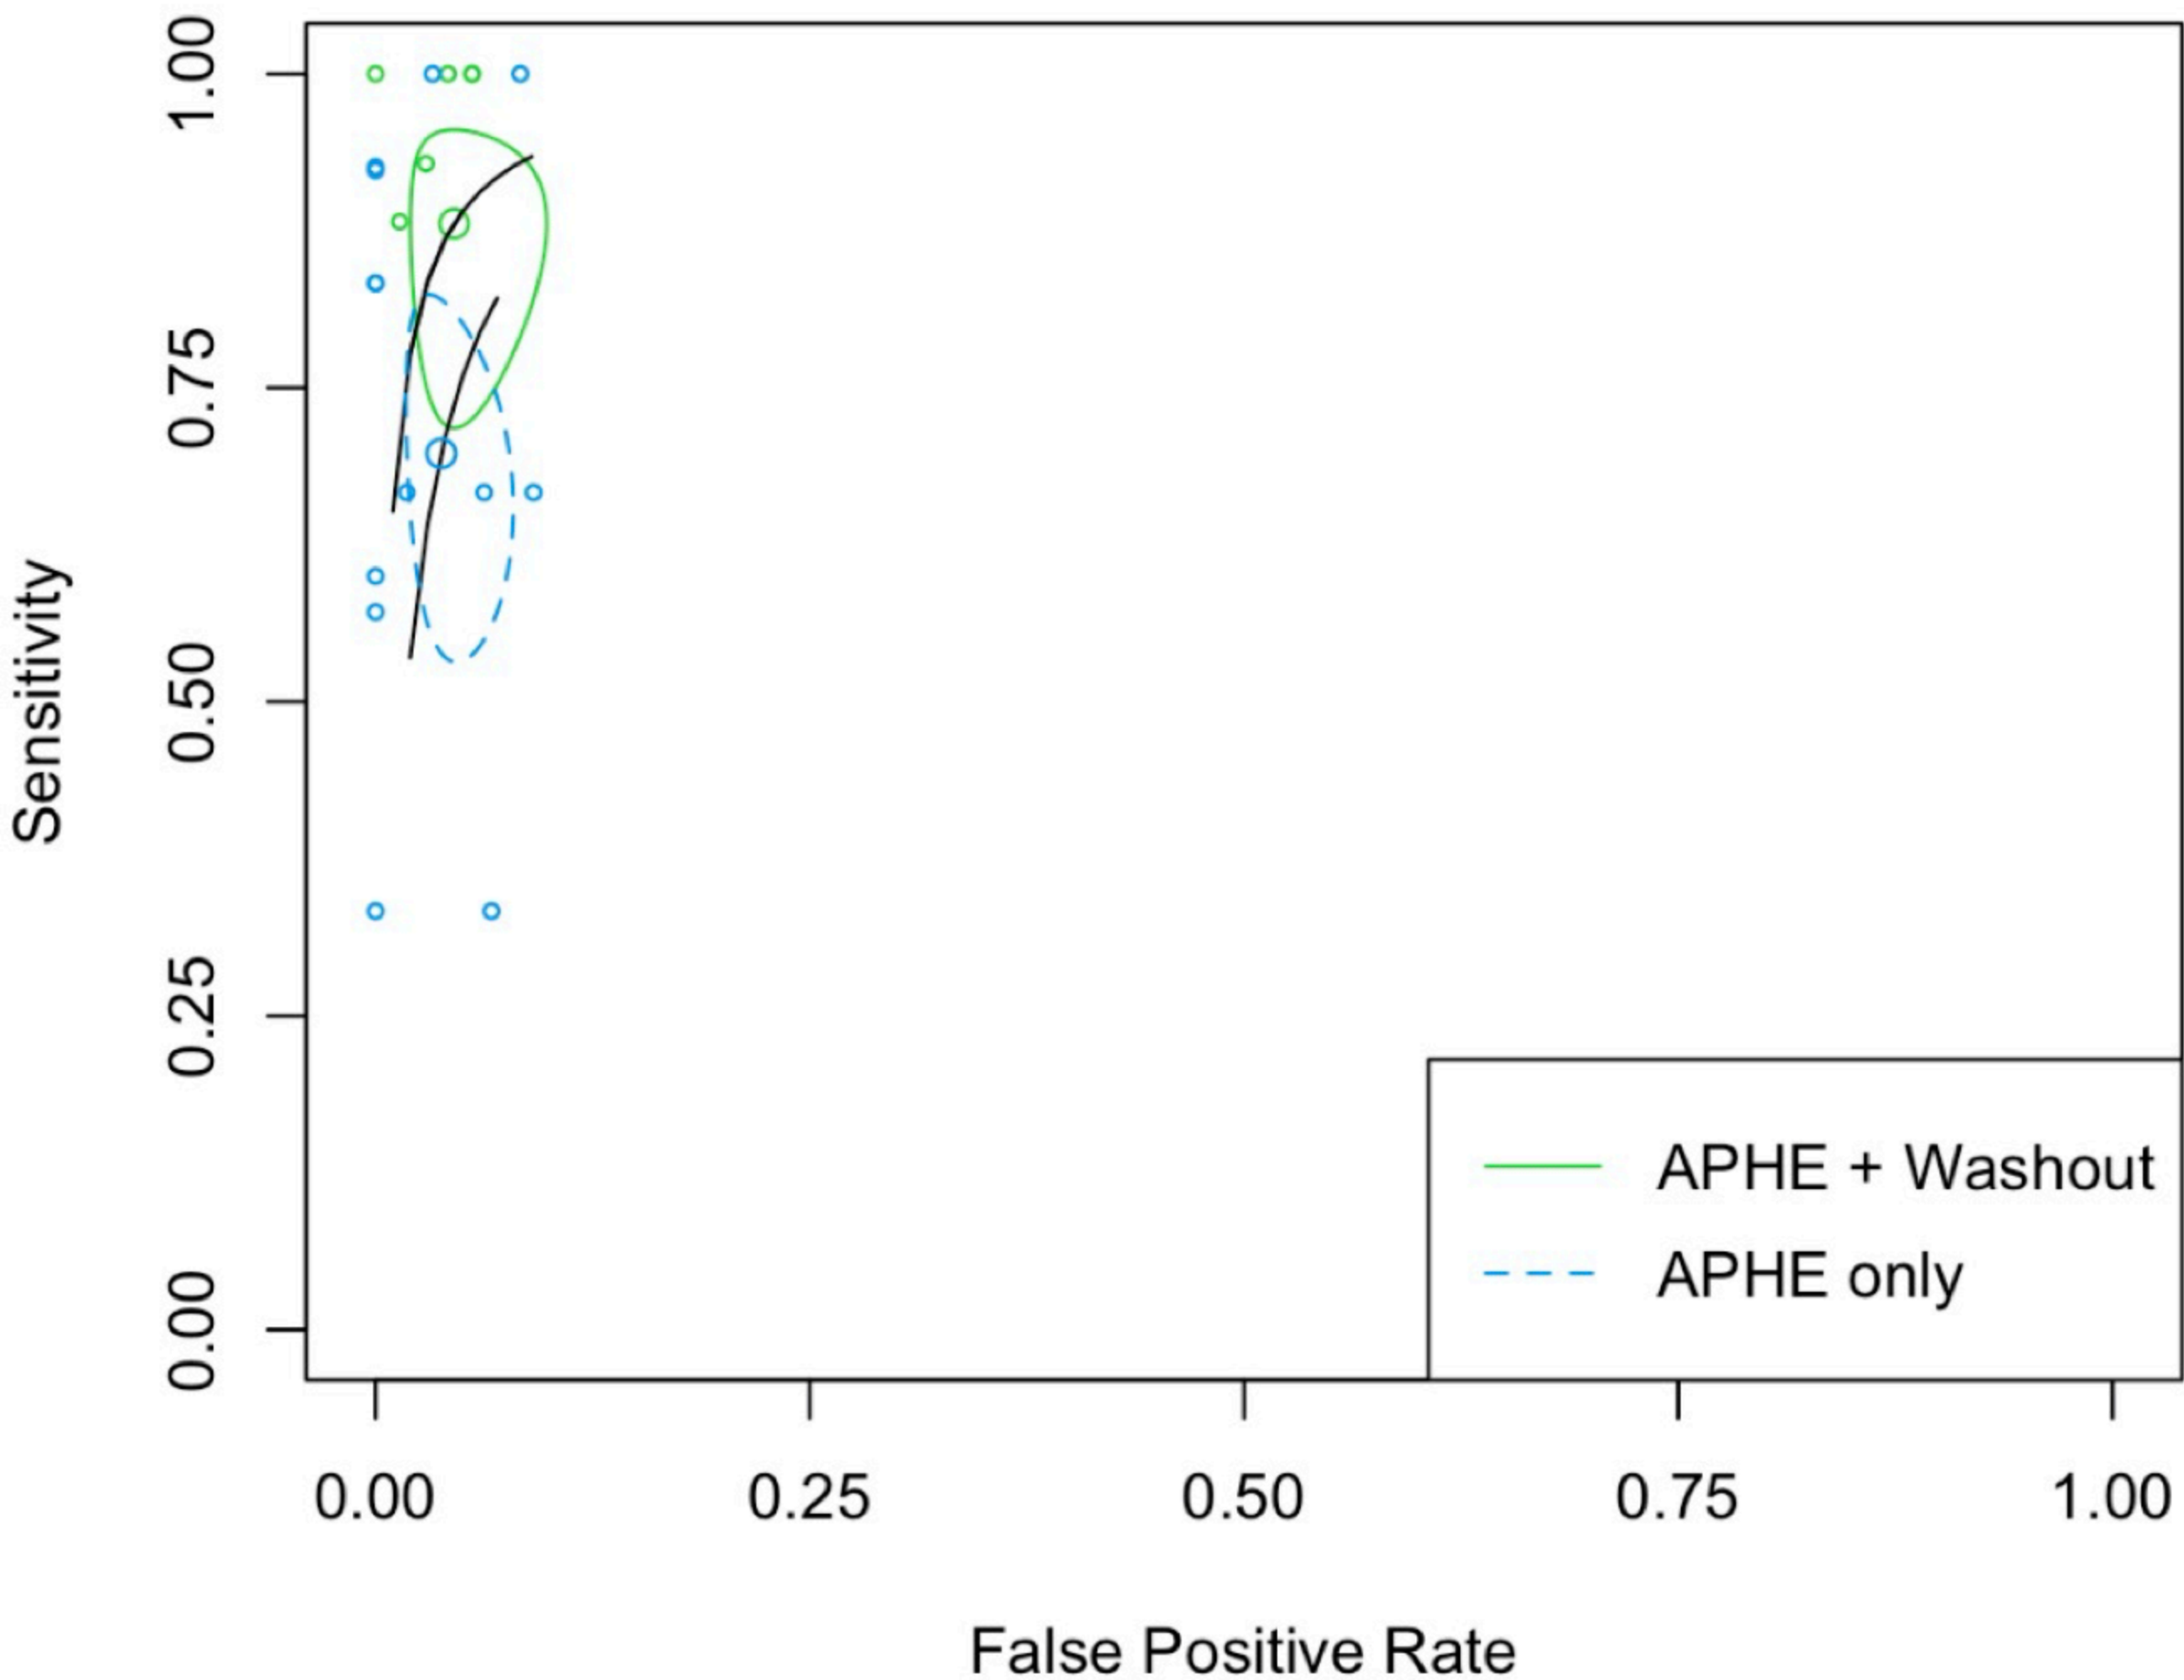

Supplement: NIHMS1749173-supplement-Supplementary_Figures_1-4.pdf [file NIHMS1749173-supplement-Supplementary_Figures_1-4.pdf]
